# Supplementary material for: Interferon-β and interleukin-6 exert opposing effects on Foxp3 acetylation to control regulatory T cell induction
Source: Frontiers journal article supplement (doi:10.3389/fimmu.2025.1593931), 2025-05-30
Supplement: Data_Sheet_1.pdf [file Data_Sheet_1.pdf]

## Supplementary Materials

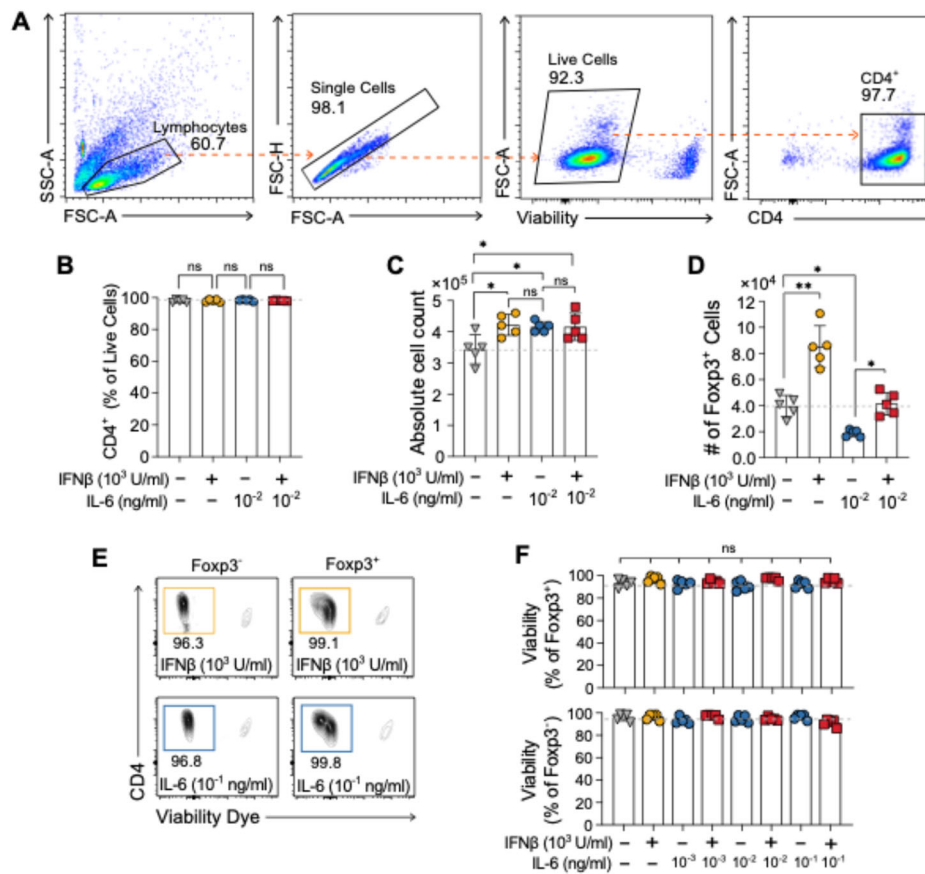

**Figure S1. Effects of IL-6 on cell viability in Treg induction cultures. (A)** Gating strategy for murine Treg induction cultures. **(B-C)** Summaries of percentage of CD4<sup>+</sup> T cells (B), Absolute cell count (C) and Number of Foxp3<sup>+</sup> cells (D) at the end of 5-day murine Treg induction cultures treated with vehicle, IFNβ (1000 U/ml), IL-6 (0.1 ng/ml) or IFNβ + IL-6. **(E)** Representative scatter plots (left) and summary of the percentage of live Foxp3<sup>+</sup> and Foxp3<sup>-</sup> cells at the end of 5-day murine Treg induction cultures treated with vehicle, IFNβ (1000 U/ml), IL-6 (0.01, 0.1, 1 ng/ml) or IFNβ + IL-6. Summaries depict mean ± SD, n=5 per group, ANOVA with post hoc Tukey HSD test, \*p<0.05, \*\*p<0.01, ns, not significant).

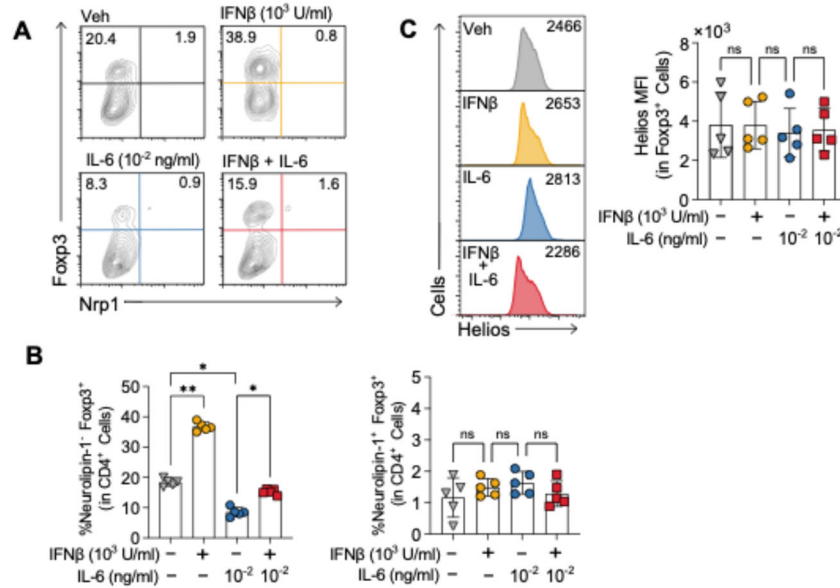

**Figure S2. Flow cytometric analysis of Treg cell markers in murine Treg induction cultures. (A-B)** Representative scatter plots (A) and summary of the percentage of Nrp1<sup>+</sup>Fcpx3<sup>+</sup> and Nrp1<sup>-</sup>Fcpx3<sup>+</sup> cells at the end of 5-day murine Treg induction cultures treated with vehicle, IFN $\beta$  (1000 U/ml), IL-6 (0.1 ng/ml) or IFN $\beta$  + IL-6. **(C)** Representative histogram (left) and summary of the mean fluorescence intensity of transcription factor Helios in Fcpx3<sup>+</sup> cells at the end of 5-day murine Treg induction cultures treated with vehicle, IFN $\beta$  (1000 U/ml), IL-6 (0.1 ng/ml) or IFN $\beta$  + IL-6. Summaries depict mean  $\pm$  SD, n=5 per group, ANOVA with post hoc Tukey HSD test, \*p<0.05, \*\*p<0.01, ns, not significant).

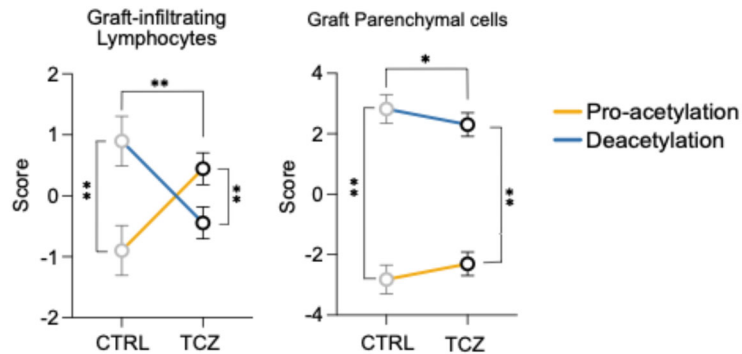

**Figure S3. Pro-acetylation and acetylation gene scores in murine transplant recipients with TCZ.** Combined pro-acetylation and deacetylation score normalized to untreated (see *Materials and Methods*) calculated from publicly available transcriptomic data of graft-infiltrating lymphocytes and graft parenchymal of BALB/c heart C57BL/6 transplant recipients cells treated in the absence (CTRL) or presence of tocilizumab (TCZ). Details of the transplants and treatments are provided in Muckenhuber et al. 2024 (mean  $\pm$  SEM, n=4 per group, ANOVA with post hoc Tukey HSD test, \* p<0.5, \*\* p<0.01).

## Supplementary Data S1 | Computational Model Details, refers to Figure 2

### 1. Model Creation

The computational model used for this work constitutes an expansion of a publicly available (<https://www.ebi.ac.uk/biomodels/BIOMD0000000451>) ordinary differential equation (ODE) model developed at the Virginia Bioinformatics Institute (1), which already included interleukin-6 (IL-6) and its impact on T cell polarization, and was later expanded by our group to include type I interferon signaling (2). The model includes 60 differential equations representing 52 reactions and 93 species, and is implemented and simulated in COPASI (3), an open-source software application used for simulating and analyzing biochemical networks and systems biology model, fully compatible with Systems Biology Markup Language (SBML). Full details on model calibration can be found in (1).

**Model assumptions.** The most relevant assumptions for the use of the model in this work are the following:

- The model assumes correct engagement of the T-cell receptor (TCR) (signal 1) and co-stimulatory receptors (signal 2). In that sense, the model is designed to explore the effects of different cytokine inputs (signal 3) on T cells.
- The model does not explicit describe/include T cell proliferation, but rather describes the system as one stereotypical cell with varying concentrations of species, Tbet, GATA-3, ROR $\gamma$ t, and Foxp3, which can successfully be mapped to the frequencies of different subsets T cell subsets (T<sub>H</sub>1, T<sub>H</sub>2, T<sub>H</sub>17, and T<sub>REG</sub>).

**Model expansion strategy.** In order to expand the model to include the effects of interferon-beta (IFN $\beta$ ) on T cell polarization we introduced two additional species: the concentration of IFNAR (type I interferon receptor in the membrane), and the concentration of IFN $\beta$  as one of the cytokines in the environment as a new input to the cell. The implementation of the IL-6 receptor signaling and its coupling to STAT3 is analogous to the one described below for IFNAR.

It has been shown that type I interferons can signal through phosphorylation of different STATs depending on cell type and context (4, 5). In order to make the model flexible, we allowed the ligated type I interferon receptor (IFNAR/IFN $\beta$ ) to phosphorylate STAT1, STAT3, STAT4, STAT5, and STAT6 through the control of 5 coupling constants,  $\alpha_1$ ,  $\alpha_3$ ,  $\alpha_4$ ,  $\alpha_5$ , and  $\alpha_6$ , respectively: This results in the addition to the model of:

1. An ODE that describes the binding of the IFN $\beta$  in the environment to the IFNAR receptor,  $IFN\beta + IFNAR1 \leftrightarrow IFN\beta/IFNAR1$  as a reversible mass action equation combined with a Hill equation that depends on the concentration of suppression of cytokine signaling 1 (SOCS1) bound to regulate Janus kinases (JAKS), which are responsible for STAT signaling

$$\frac{d[IFN\beta/IFNAR1]}{dt} = Vf[IFN\beta][IFNAR1] \frac{K^2}{[SOCS1/JAKS]^2 + K^2} - Vr[IFN\beta/IFNAR1], \quad (1)$$

where all concentrations vary over time and the parameters  $Vf=0.1$ ,  $K=0.2639$ , and  $Vr=0.1$  were chosen based on the parameters used to describe cytokine binding to similar receptors already in the model, such as the IL-6 or the IL-2 receptors.

2. An activation term in the ODEs that govern STAT1, STAT3, STAT4, STAT5, and STAT6 phosphorylation,  $STAT_i \leftrightarrow STAT\_P_i$ . These ODEs are in the model of the form:

$$\frac{d[STAT\_P_i]}{dt} = Vf[STAT_i] \cdot I \cdot A - Vr[STAT\_P_i], \quad (2)$$

where all concentrations vary over time. The parameter  $I$  includes all the inactivation terms mediated by the different species and has the general form of

$$I = \prod_{i=1}^{ni} \frac{KI_i^2}{[I_i](t)^2 + KI_i^2}, \quad (3)$$

and  $A$  includes all the activation terms mediated by the different species of the general form

$$A = \sum_{i=1}^{na} \frac{[A_i](t)^2}{[A_i](t)^2 + KA_i^2}, \quad (4)$$

being  $[I_i]$  and  $[A_i]$  the concentrations of the inhibitory and activating species as a function of time, respectively, and  $KI_i$  and  $KA_i$  are specific constant for each species that modulate their effects.

To include the coupling of IFN $\beta$ -mediated signaling to each of the STATs, we added an activation term preceded by a coupling parameter  $\alpha$  as:

$$\alpha \frac{[IFNAR1/IFN\beta]^2}{[IFNAR1/IFN\beta]^2 + K^2}. \quad (5)$$

We also included the following changes in four of the parameters from the original model to ensure the proper behavior of the model (see section 2) in the presence of the new receptor.

- in equation re15 (Tbet $\leftrightarrow$ TbetP): K3 change from 3.58849 to 1e-3
- in equation re13 (STAT1 $\leftrightarrow$ STAT1P): K1 change from 5.04432 to 1
- in equation re23 (GATA3 $\leftrightarrow$ GATA3P): K4 from 0.321065 to 1e-5 and K5 from 0.1 to 1e-5

## 2. Optimization of IFN $\beta$ effects on T<sub>H</sub>1, T<sub>H</sub>2, T<sub>H</sub>17 and T<sub>REG</sub> polarizations

We verified that, in the absence of IFN $\beta$ , the expanded model adequately polarized CD4<sup>+</sup> naïve T cells to T<sub>H</sub>1 (in the presence of IL-12, IL-18 and IFN $\gamma$ ), T<sub>H</sub>2 (in the presence of IL-4 and IL-2), T<sub>H</sub>17 (in the presence of IL-6 and TGF- $\beta$ ) and T<sub>REG</sub> (in the presence of IL-2 and TGF- $\beta$ ). We tested *in silico* the potential effects of IFN $\beta$  on each of these polarizations by allowing the coupling (weights) of IFNAR to the different STATs to vary in the model such that they maximized the effect of IFN $\beta$  on each of the polarizations. To achieve this we found the vector of STAT-coupling weights that maximized the overall concentration of the active form of the appropriate transcription factor (Tbet for T<sub>H</sub>1, GATA-3 for T<sub>H</sub>2, ROR $\gamma$ t for Th17, and Foxp3 for T<sub>REG</sub>) with respect to the others in the span of 5 days (120 hour). We implemented these searches as an optimization problem in which we maximized the corresponding cost functions

$$f_{T_H1} = \sum_{ti=1}^{120} |[Tbet](ti)^2 - [GATA3](ti)^2 - [ROR\gamma t](ti)^2 - [Foxp3](ti)^2| \quad (6)$$

$$f_{T_H2} = \sum_{ti=1}^{120} |[GATA3](ti)^2 - [Tbet](ti)^2 - [ROR\gamma t](ti)^2 - [Foxp3](ti)^2| \quad (7)$$

$$f_{T_H17} = \sum_{ti=1}^{120} |[ROR\gamma t](ti)^2 - [Tbet](ti)^2 - [GATA3](ti)^2 - [Foxp3](ti)^2| \quad (8)$$

$$f_{T_{REG}} = \sum_{ti=1}^{120} |[Foxp3](ti)^2 - [Tbet](ti)^2 - [GATA3](ti)^2 - [ROR\gamma t](ti)^2| \quad (9)$$

for the parameter vector  $\vec{\alpha} = [\alpha_1, \alpha_3, \alpha_4, \alpha_5, \alpha_6]$  with values constrained to  $\alpha_i \in [0,1]$  and initial values=0.5. We solved these highly non-linear problems using a random search algorithm implemented in COPASI with 1000 iterations (in average ~500 iterations were enough to reach convergence). Optimization was run 10 times for each polarization and the optimized models for each polarization parametrized with the average values for  $\alpha_1, \alpha_3, \alpha_4, \alpha_5$ , and  $\alpha_6$  of the 10 runs (see **Table 1**).

|                   | Average    |            |            |            |            | SD         |            |            |            |            |
|-------------------|------------|------------|------------|------------|------------|------------|------------|------------|------------|------------|
|                   | $\alpha_1$ | $\alpha_3$ | $\alpha_4$ | $\alpha_5$ | $\alpha_6$ | $\alpha_1$ | $\alpha_3$ | $\alpha_4$ | $\alpha_5$ | $\alpha_6$ |
| T <sub>H</sub> 1  | 0.904      | 0.201      | 0.967      | 0.987      | 0.249      | 0.067      | 0.045      | 0.0526     | 0.032      | 0.002      |
| T <sub>H</sub> 2  | 0.01       | 0.39       | 0.19       | 0.87       | 0.28       | 0.0023     | 0.025      | 0.0067     | 0.0087     | 0.00065    |
| T <sub>H</sub> 17 | 0.105      | 0.912      | 0.166      | 0.097      | 0.307      | 0.045      | 0.0263     | 0.022      | 0.067      | 0.0087     |
| T <sub>REG</sub>  | 0.983      | 0.001      | 0.605      | 0.858      | 0.098      | 0.0013     | 0.0002     | 0.023      | 0.078      | 0.0012     |

**Table 1. Optimized weights for each polarization.** Average and standard deviation (SD) of 10 optimization runs.

We first validated that the model that includes the  $T_{REG}$  effect recapitulated the biology of T cell polarization. We ran computational simulations of the differentiation from the naïve state into  $T_H1$  (IL-12 + IL-18 +  $IFN\gamma$ )  $T_H2$  (IL-2 + IL-4),  $T_H17$  (IL-6 + TGF $\beta$ ) and  $T_{REG}$  (IL-2 + TGF $\beta$ ) (**Figure 1**)

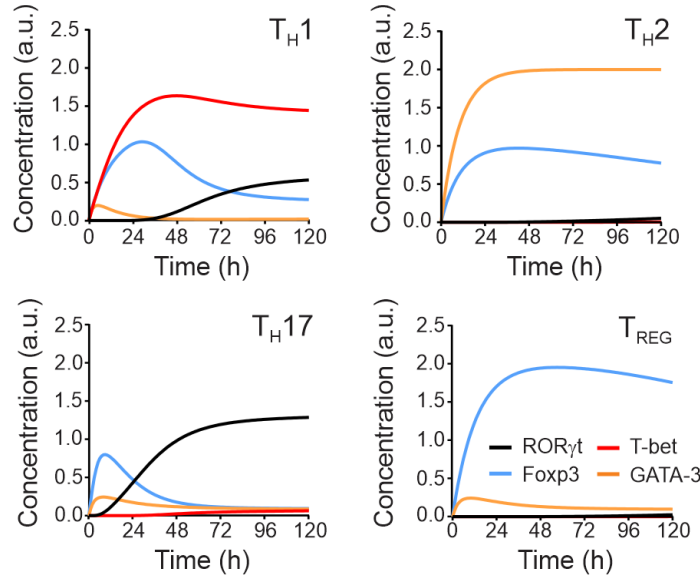

**Figure 1.** Simulations of the optimized model in  $T_H1$ ,  $T_H2$ ,  $T_H17$  and  $T_{REG}$  polarizing conditions.

We then simulated the optimized model for each polarization at  $IFN\beta$  concentrations ranging from 0 to 10,000 U/ml. Simulations indicate a greater and unexpected proportional effect of  $IFN\beta$  on the  $T_{REG}$  polarization (**Figure 2**).

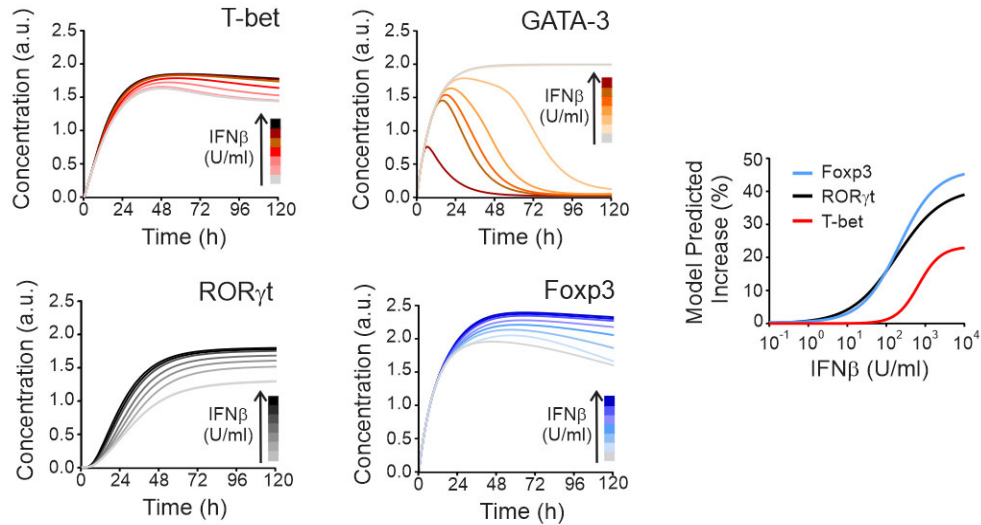

**Figure 2.** Maximal effects of  $IFN\beta$  on  $T_H1$ ,  $T_H2$ ,  $T_H17$  and  $T_{REG}$  polarizations utilizing an optimized coupling of  $IFNAR$  signaling to the  $STATs$  for each polarization.  $IFN\beta$  concentrations varied from 0 to 10,000 U/ml for all simulations.

### 3. Calibration of the T<sub>REG</sub>-optimized computational model to T<sub>REG</sub> induction experimental data in the presence of IFN $\beta$ and IL-6

The calibration of the model was done in 3 steps.

1. We obtained the conversion of IFN $\beta$  concentration in U/ml to model units (mol/l). We performed proliferation experiments in CD4<sup>+</sup> Naïve T cells stimulated with  $\alpha$ CD3/ $\alpha$ CD28 in the presence of increasing concentrations of IFN $\beta$ . We simulated the model in the same conditions and obtained a dose-response-curve of the percentage of IFN $\gamma$ <sup>+</sup> cells, assumed to be linearly related to the concentration of IFN $\gamma$  in the model. We fit the simulated and the experimental dose-response and derived the mapping of IFN $\beta$  in experimental U/ml to mol/l. (**Fig.3 left**).
2. We simulated the T<sub>REG</sub>-optimized model (see section 2) at 0, 10, 100, 1000 U/ml and compared the Foxp3 concentration at day 5 in the model with the experimental results expressed as the percentage of Foxp3<sup>+</sup> cells from **Figure 2C** in the main manuscript. We performed a linear regression to calibrate the T<sub>REG</sub>-opt and extract the relationship between the concentration of Foxp3 in the model and the percentage of Foxp3<sup>+</sup> cells in a murine T<sub>REG</sub> induction (**Fig.3 center**).
3. We proceeded to obtain the relationship between IL-6 concentration in the model and IL-6 concentration in the culture by fitting the percentage of Foxp3<sup>+</sup> cells in the model using the curve obtained in 2, to the T<sub>REG</sub> induction experimental results obtained in the presence of IL-6 at 0.01 ng/ml, 0.1 ng/ml and 1 ng/ml (**Fig.3 right**).

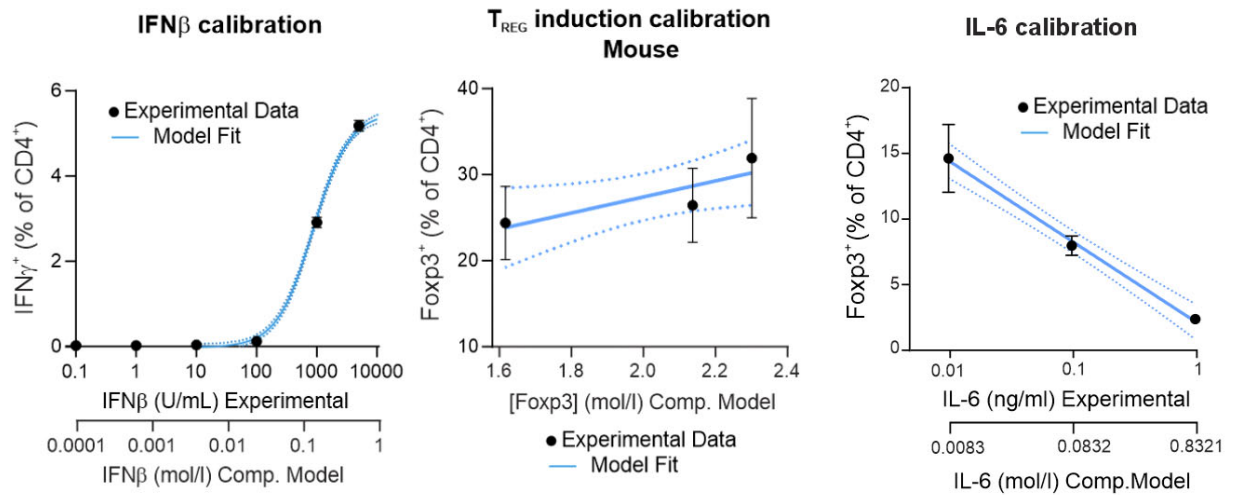

**Figure 3.** Calibration results of the computational model to experimental data.

### References

1. Carbo A, Hontecillas R, Kronsteiner B, Viladomiu M, Pedragosa M, Lu P et al. Systems modeling of molecular mechanisms controlling cytokine-driven CD4<sup>+</sup> T cell differentiation and phenotype plasticity. PLoS Comput Biol 2013;9(4):e1003027.

2. Fueyo-González F, McGinty M, Ningoo M, Anderson L, Cantarelli C, Andrea Angeletti et al. Interferon- $\beta$  acts directly on T cells to prolong allograft survival by enhancing regulatory T cell induction through Foxp3 acetylation. *Immunity* 2022;55(3):459-474.e457.
3. Hoops S, Sahle S, Gauges R, Lee C, Pahle J, Simus N et al. COPASI--a COmplex PAthway SIMulator. *Bioinformatics* 2006;22(24):3067-3074.
4. Plataniias LC. Mechanisms of type-I- and type-II-interferon-mediated signalling. *Nat Rev Immunol* 2005;5(5):375-386.
5. van Boxel-Dezaire AH, Rani MR, Stark GR. Complex modulation of cell type-specific signaling in response to type I interferons. *Immunity* 2006;25(3):361-372.



**Supplementary Table S1. Reagents**

| REAGENT or RESOURCE                              | SOURCE         | IDENTIFIER                      |
|--------------------------------------------------|----------------|---------------------------------|
| Antibodies                                       |                |                                 |
| PE-Cy7 anti-mouse CD4 antibody                   | eBiosciences   | Cat# 25-0041-82 RRID:AB_469576  |
| PerCP Cy5.5 anti-mouse CD45 antibody             | Invitrogen     | Cat# 45-0451-82 RRID:AB_1107002 |
| FITC anti-mouse CD3 antibody                     | Invitrogen     | Cat# 11-0031-85 RRID:AB_464883  |
| TIP60 (C-7) AF488                                | SantaCruz      | Cat# Sc-166323                  |
| P300 (F-4) AF488                                 | SantaCruz      | Cat# Sc-48343                   |
| TIP60 (C-7) AF546                                | SantaCruz      | Cat# Sc-166323                  |
| BV450 anti-human Foxp3                           | eBiosciences   | Cat# 48-4776-42 RRID:AB_1834364 |
| eFluor450 anti-mouse Foxp3                       | eBiosciences   | Cat# 48-5773-82 RRID:AB_1518812 |
| A488 anti-mouse Foxp3                            | eBiosciences   | Cat# 53-5773-82 RRID:AB_1518812 |
| FITC anti-mouse CD25 antibody                    | BD Biosciences | Cat# 553072 RRID:AB_394604      |
| APC anti-IL17A antibody                          | eBiosciences   | Cat# 17-7177-81 RRID:AB_763580  |
| APC anti-mouse T-bet                             | eBiosciences   | Cat#17-5825-82 RRID:AB_2744712  |
| PE anti-human anti-mouse pSTAT1 (pY701) antibody | BD Biosciences | Cat# 612564; RRID:AB_399855     |
| PacBlue anti-human anti-mouse pSTAT3 (pY705)     | BD Biosciences | Cat# 560312; RRID:AB_1645327    |
| $\alpha$ CD3 mouse                               | BioLegend      | Cat# 100201 RRID:AB_312658      |
| $\alpha$ CD3 human                               | BD Biosciences | Cat# 566685                     |
| $\alpha$ CD28 human                              | BD Biosciences | Cat# 555725                     |
| FITC anti-human Foxp3                            | eBiosciences   | Cat# 11-4777-42 RRID:AB_1518812 |
| PerCP Cy5.5 anti-human CD4 antibody              | BD Biosciences | Cat# 552838 RRID:AB_394488      |
| APC anti-human CD25 antibody                     | eBiosciences   | Cat# 17-0259-42 RRID:AB_1582219 |
| PE anti-human CD127 antibody                     | BD Biosciences | Cat# 557938 RRID:AB_2296056     |
| FITC anti-human CD4 antibody                     | eBiosciences   | Cat# 11-0042-86 RRID:AB_464898  |
| Anti-Acetyl Lysine-HRP                           | Immunechem     | Cat# ICP0381                    |
| Chemical, Peptides and Recombinant Proteins      |                |                                 |
| Recombinant murine IL-2                          | Peprotech      | Cat# 212-12                     |
| Recombinant TGF $\beta$ 1                        | Peprotech      | Cat# 100-21C                    |
| Recombinant human IL-2                           | BD Pharmingen  | Cat# 554603                     |
| CellTrace violet Cell Proliferation              | Thermofisher   | Cat# C34557                     |
| eFluor 780 Fixable viability dye                 | eBioscience    | Cat# 65-0865-14                 |
| Recombinant murine IL-6                          | Peprotech      | Cat# 216-16                     |

|                                                        |                       |                 |
|--------------------------------------------------------|-----------------------|-----------------|
| Recombinant murine IFN $\beta$                         | PBL Assay Science     | Cat# 12410-1    |
| Recombinant human IL-6                                 | Peptotech             | Cat# 216-06     |
| Recombinant human IFN $\beta$                          | PBL Assay Science     | Cat# 11410-2    |
| AffinityScript MultiTemp RT                            | Agilent               | Cat# 600105     |
| PlatinumTaq DNA polymerase                             | Invitrogen            | Cat# 11804011   |
| SYBR Green                                             | Invitrogen            | Cat# 4402959    |
| TMP195                                                 | SelleckChem           | Cat# S8502      |
| Critical Commercial Assays                             |                       |                 |
| EasySep™ Mouse Naïve CD4+ T Cell Isolation Kit         | STEMCELL Technologies | Cat# 19765      |
| EasySep™ Human Naïve CD4+ T Cell Isolation Kit         | STEMCELL Technologies | Cat# 19555      |
| EasySep™ Mouse T Cell Isolation Kit                    | STEMCELL Technologies | Cat# 19851      |
| EasySep™ Mouse CD90.2 Positive Selection Kit II        | STEMCELL Technologies | Cat# 18951      |
| aCD3/aCD28 stimulating beads murine                    | Gibco                 | Cat# 11-161D    |
| aCD3/aCD28 stimulating beads human                     | Gibco                 | Cat# 11-456D    |
| Intracellular/transcription factor staining buffer kit | eBiosciences          | Cat# 00-5523-00 |
